# Supplementary material
Source: PubMed Central journal article supplement (PMC5940438)
Supplement: jcsm.14.5.857s1.pdf [file jcsm.14.5.857s1.pdf]

**Table S1**—Cox Regression Analysis of the Multiplicative Interaction between Short Sleep Duration and Lifestyle Factors or Health Status in Women.

| Characteristics                    | HR (95% CI) <sup>a</sup> |                  | Interaction      |      |
|------------------------------------|--------------------------|------------------|------------------|------|
|                                    | 6.5-7.5 (h/d)            | <6.5 (h/d)       | HR (95% CI)      | P    |
| <b>Low-level physical activity</b> |                          |                  | 1.03 (0.99-1.08) | .160 |
| No                                 | Referent                 | 1.96 (0.89-4.31) |                  |      |
| Yes                                | 1.73 (0.73-4.11)         | 3.77 (1.75-8.12) |                  |      |
| <b>Overweight and obesity</b>      |                          |                  | 0.99 (0.98-1.00) | .017 |
| No                                 | Referent                 | 2.71 (1.12-6.59) |                  |      |
| Yes                                | 1.49 (0.59-3.76)         | 2.62 (1.10-6.23) |                  |      |
| <b>Hypertension</b>                |                          |                  | 1.00 (0.92-1.09) | .970 |
| No                                 | Referent                 | 1.47 (0.70-3.11) |                  |      |
| Yes                                | 0.80 (0.33-1.95)         | 2.28 (1.09-4.73) |                  |      |
| <b>T2DM</b>                        |                          |                  | 1.02 (0.91-1.16) | .708 |
| No                                 | Referent                 | 1.96 (1.12-3.44) |                  |      |
| Yes                                | 0.87 (0.20-3.82)         | 2.70 (1.10-6.64) |                  |      |
| <b>Dyslipidemia</b>                |                          |                  | 1.00 (0.92-1.08) | .984 |
| No                                 | Referent                 | 2.02 (0.99-4.13) |                  |      |
| Yes                                | 1.12 (0.48-2.63)         | 2.40 (1.14-5.05) |                  |      |

Abbreviations: CI, confidence interval; HR, hazard ratio; T2DM, type 2 diabetes mellitus.

<sup>a</sup> HR is adjusted for Model 2 (age, marital status, education, monthly income, smoking status, alcohol, tea drinking, physical activity level, BMI, systolic blood pressure, fasting plasma glucose, and triglycerides and high-density lipoprotein cholesterol levels, except for the respective stratification variable)

**Table S2**—Cox Regression Analysis of the Multiplicative Interaction between Short Sleep Duration and Lifestyle Factors or Health Status in Men.

| Characteristics                    | HR (95% CI) <sup>a</sup> |                  | Interaction      |        |
|------------------------------------|--------------------------|------------------|------------------|--------|
|                                    | 6.5-7.5 (h/d)            | <6.5 (h/d)       | HR (95% CI)      | P      |
| <b>Smoking</b>                     |                          |                  | 1.00 (0.97-1.04) | .841   |
| No                                 | Referent                 | 1.29 (0.65-2.56) |                  |        |
| Yes                                | 0.96 (0.52-1.77)         | 1.18 (0.63-2.18) |                  |        |
| <b>Alcohol drinking</b>            |                          |                  | 1.01 (0.98-1.05) | .457   |
| No                                 | Referent                 | 1.10 (0.69-1.74) |                  |        |
| Yes                                | 0.80 (0.40-1.59)         | 1.48 (0.80-2.72) |                  |        |
| <b>Low-level physical activity</b> |                          |                  | 1.02 (0.99-1.06) | .197   |
| No                                 | Referent                 | 1.41 (0.82-2.42) |                  |        |
| Yes                                | 1.72 (0.94-3.15)         | 1.84 (1.04-3.23) |                  |        |
| <b>Overweight and obesity</b>      |                          |                  | 1.00 (0.99-1.00) | .249   |
| No                                 | Referent                 | 1.32 (0.82-2.12) |                  |        |
| Yes                                | 0.58 (0.31-1.09)         | 0.56 (0.27-1.19) |                  |        |
| <b>Hypertension</b>                |                          |                  | 1.14 (1.07-1.22) | < .001 |
| No                                 | Referent                 | 1.13 (0.63-2.02) |                  |        |
| Yes                                | 2.25 (1.25-4.05)         | 2.83 (1.60-5.02) |                  |        |
| <b>T2DM</b>                        |                          |                  | 1.07 (0.97-1.18) | .187   |
| No                                 | Referent                 | 1.36 (0.89-2.07) |                  |        |
| Yes                                | 1.99 (0.90-4.40)         | 1.31 (0.40-4.27) |                  |        |
| <b>Dyslipidemia</b>                |                          |                  | 1.03 (0.96-1.10) | .425   |
| No                                 | Referent                 | 1.35 (0.79-2.32) |                  |        |
| Yes                                | 1.31 (0.74-2.32)         | 1.45 (0.82-2.58) |                  |        |

Abbreviations: CI, confidence interval; HR, hazard ratio; T2DM, type 2 diabetes mellitus.

<sup>a</sup> HR is adjusted for Model 2 (age, marital status, education, monthly income, smoking status, alcohol, tea drinking, physical activity level, BMI, systolic blood pressure, fasting plasma glucose, and triglycerides and high-density lipoprotein cholesterol levels, except for the respective stratification variable)
